# Supplementary material for: Enhanced dielectric performance of PDMS-based three-phase percolative nanocomposite films incorporating a high dielectric constant ceramic and conductive multi-walled carbon nanotubes
Source: Royal Society of Chemistry journal article supplement (doi:10.1039/c8tc03868f), 2018-01-01
Supplement: c8tc03868f1.pdf [file c8tc03868f1.pdf]

**Enhanced dielectric performance of PDMS-based  
three-phase percolative nanocomposite films  
incorporated with high dielectric constant ceramic  
and conductive multi-walled carbon nanotubes**

*Guifang Liu,<sup>a</sup> Yi Chen<sup>d</sup>, Minjie Gong,<sup>a</sup> Xiaoyun Liu,<sup>a</sup> Zhong-Kai Cui,<sup>b,\*</sup> Qibing Pei,<sup>c</sup> Jinlou Gu,<sup>a</sup>*

*Chen Huang,<sup>a</sup> Qixin Zhuang<sup>a,\*</sup>*

<sup>a</sup>. Key Laboratory of Advanced Polymer Materials of Shanghai, School of Materials Science and Engineering, East China University of Science and Technology, Shanghai 200237, China.

<sup>b</sup>. Southern Medical University, Guangzhou, Guangdong Province, 510515, China.

<sup>c</sup>. Soft Materials Research Laboratory, Department of Materials Science and Engineering, University of California, Los Angeles, Los Angeles, CA 90095, United State.

<sup>d</sup>. Shanghai Spaceflight Precision Machinery Institute, shanghai, 201600, china.

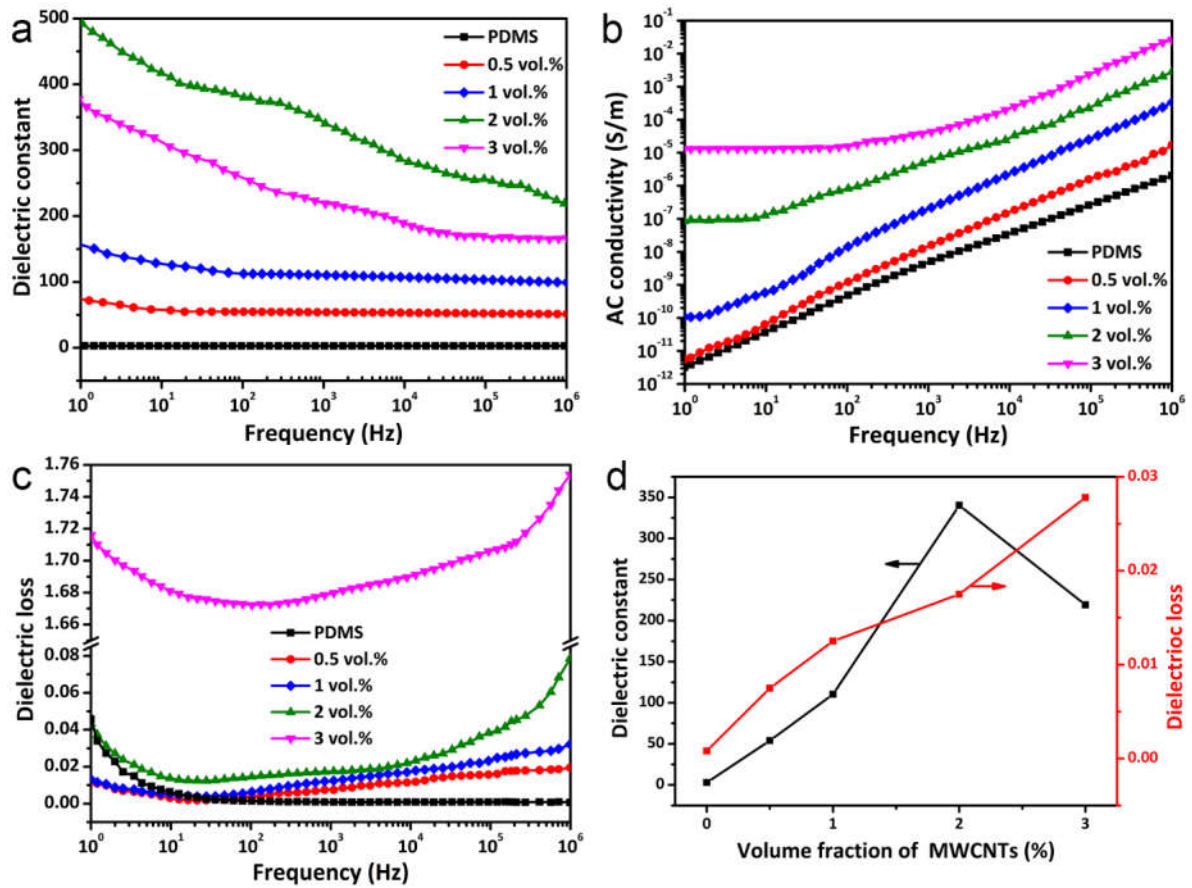

Fig. S1 (a) Dielectric constant, (b) conductivity and (c) dielectric loss as a function of frequency for pure PDMS and MWCNTs/PDMS films with various amounts of MWCNTs at room temperature, (d) dielectric constant and dielectric loss as a function of volume fraction of MWCNTs at 1 kHz and room temperature.

**Table S1** The dielectric and mechanical properties of pure PDMS and CCTO@MWCNTs/PDMS (10 vol.% CCTO) with various amounts of MWCNTs.

| Sample    | $\epsilon$ | $E_b$ (kV mm <sup>-1</sup> ) | Young' s modulus (MPa) | Tensile strength (MPa) | Breaking elongation (%) |
|-----------|------------|------------------------------|------------------------|------------------------|-------------------------|
| Pure PDMS | 2.93       | 65.3 ± 0.6                   | 0.70 ± 0.009           | 0.37 ± 0.016           | 255 ± 5                 |
| 0.5 vol.% | 96.5       | 57.0 ± 1.3                   | 0.85 ± 0.013           | 0.47 ± 0.012           | 242 ± 9                 |
| 1 vol.%   | 138        | 55.7 ± 1.4                   | 0.95 ± 0.012           | 0.69 ± 0.023           | 222 ± 9                 |
| 2 vol.%   | 308        | 52.8 ± 1.0                   | 1.06 ± 0.008           | 1.07 ± 0.016           | 179 ± 8                 |
| 2.3 vol.% | 419        | 52.1 ± 0.6                   | 1.08 ± 0.010           | 1.08 ± 0.013           | 162 ± 11                |
| 3 vol.%   | 699        | 50.7 ± 1.1                   | 1.12 ± 0.012           | 1.12 ± 0.021           | 134 ± 7                 |
| 4 vol.%   | 2133       | 47.1 ± 0.8                   | 1.16 ± 0.011           | 0.83 ± 0.013           | 93 ± 5                  |
